# Supplementary material for: Food Addiction among Female Patients Seeking Treatment for an Eating Disorder: Prevalence and Associated Factors
Source: PubMed Central journal article supplement (PMC7353200; doi:10.3390/nu12061897), 2020-06-26
Supplement: nutrients-12-01897-s001.pdf [file nutrients-12-01897-s001.pdf]

**Table S1. Description of the sample according to ED (n=195).**

|                                                    | Entire sample<br>(N=195) | AN-R<br>(n=65)<br><i>n (%) or m (sd)</i> | AN-BP<br>(n=33) | BN<br>(n=82) | BED<br>(n=15) |
|----------------------------------------------------|--------------------------|------------------------------------------|-----------------|--------------|---------------|
| <b>Sociodemographic characteristics</b>            |                          |                                          |                 |              |               |
| Age (years)                                        | 23.1 (7.4)               | 21,4 (5.9)                               | 22.2 (6.7)      | 24.0 (8.3)   | 27.1 (8.1)    |
| <b>Eating disorders characteristics</b>            |                          |                                          |                 |              |               |
| Recurrent episodes of binge eating (yes)           | 114 (58.5%)              | 0 (0.0%)                                 | 17 (51.5%)      | 82 (100%)    | 15 (100%)     |
| Age of disease onset (years)                       | 15.9 (5.0)               | 17,4 (5.1)                               | 14.4 (3.7)      | 15.4 (3.7)   | 15.6 (10.1)   |
| Disease duration (years)                           | 7.2 (7.6)                | 4.0 (5.1)                                | 7.8 (8.0)       | 8.6 (8.3)    | 11.5 (8.0)    |
| Severity of ED (MROAS total score)                 | 6.4 (2.0)                | 5.9 (1.8)                                | 5.2 (1.8)       | 7.0 (1.9)    | 7.9 (1.5)     |
| <b>Dimensions associated with ED (EDI-2)</b>       |                          |                                          |                 |              |               |
| Ineffectiveness                                    | 13.4 (7.0)               | 11.5 (6.1)                               | 13.8 (7.5)      | 14.4 (7.2)   | 14.5 (7.1)    |
| Interceptive awareness                             | 13.6 (6.8)               | 10.5 (6.0)                               | 16.8 (5.9)      | 14.7 (6.9)   | 13.4 (6.4)    |
| Asceticism                                         | 8.5 (4.5)                | 7.5 (4.1)                                | 10.1 (4.1)      | 9.2 (4.8)    | 6.3 (3.4)     |
| Drive for thinness                                 | 15.3 (5.1)               | 13.6 (5.8)                               | 16.0 (5.2)      | 16.8 (4.0)   | 12.9 (4.3)    |
| Bulimia                                            | 8.2 (6.7)                | 1.6 (2.6)                                | 7.6 (6.1)       | 12.7 (4.7)   | 12.9 (4.7)    |
| Body dissatisfaction                               | 18.0 (7.2)               | 13.4 (6.8)                               | 19.0 (6.2)      | 20.5 (6.2)   | 22.1 (6.2)    |
| Perfectionism                                      | 7.3 (4.5)                | 6.7 (4.1)                                | 8.6 (4.4)       | 7.2 (4.6)    | 7.0 (4.9)     |
| Interpersonal distrust                             | 7.7 (4.5)                | 7.0 (3.7)                                | 9.4 (4.6)       | 7.6 (5.0)    | 7.2 (4.6)     |
| Maturity fears                                     | 7.9 (5.9)                | 7.5 (6.0)                                | 8.7 (5.8)       | 8.0 (6.0)    | 7.5 (5.3)     |
| Impulse regulation                                 | 8.4 (6.6)                | 6.5 (5.3)                                | 9.4 (6.8)       | 9.5 (7.1)    | 8.5 (7.0)     |
| Social insecurity                                  | 9.9 (4.8)                | 8.9 (3.8)                                | 10.7 (5.5)      | 10.5 (5.1)   | 9.3 (4.7)     |
| <b>Comorbidities (current or past)</b>             |                          |                                          |                 |              |               |
| Mood disorders (MINI)                              | 156 (80.0%)              | 46 (70.8%)                               | 28 (84.8%)      | 69 (84.1%)   | 13 (86.7%)    |
| Anxiety disorders (MINI)                           | 141 (72.3%)              | 42 (64.6%)                               | 28 (84.8%)      | 60 (73.2%)   | 11 (73.3%)    |
| Psychotic syndrome (MINI)                          | 12 (6.2%)                | 3 (4.6%)                                 | 2 (6.1%)        | 7 (8.5%)     | 0 (0.0%)      |
| Addictive disorders (MINI and MIDI)                | 90 (46.2%)               | 24 (36.9%)                               | 18 (54.5%)      | 41 (50.0%)   | 7 (46.7%)     |
| ADHD in childhood (WURS-C)                         | 66 (33.8%)               | 10 (15.4%)                               | 13 (39.4%)      | 36 (43.9%)   | 7 (46.7%)     |
| <b>Impulsivity</b>                                 |                          |                                          |                 |              |               |
| UPPS-Urgency                                       | 10.5 (3.0)               | 9.9 (2.8)                                | 10.5 (3.2)      | 11.0 (2.9)   | 11.0 (3.2)    |
| UPPS-Premeditation (lack)                          | 7.5 (2.5)                | 6.8 (2.1)                                | 6.8 (2.3)       | 7.9 (2.5)    | 9.4 (2.7)     |
| UPPS-Perseverance (lack)                           | 7.4 (2.9)                | 6.6 (2.2)                                | 6.7 (2.4)       | 7.8 (2.8)    | 10.6 (4.3)    |
| UPPS-Sensation seeking                             | 9.8 (3.2)                | 9.2 (3.0)                                | 10.7 (3.7)      | 9.9 (3.0)    | 10.3 (2.8)    |
| <b>Temperament Comorbidities (current or past)</b> |                          |                                          |                 |              |               |
| TCI-Novelty seeking                                | 40.8 (19.3)              | 33.4 (16.1)                              | 40.0 (16.9)     | 43.9 (20.2)  | 58.0 (18.0)   |
| TCI-Harm avoidance                                 | 74.2 (20.6)              | 75.9 (20.2)                              | 69.5 (21.5)     | 73.8 (21.0)  | 78.7 (17.4)   |
| TCI-Reward dependence                              | 60.4 (17.5)              | 60.7 (16.2)                              | 54.4 (17.3)     | 61.6 (18.4)  | 65.5 (17.4)   |
| TCI-Persistence                                    | 72.6 (28.7)              | 79.4 (26.0)                              | 89.1 (17.4)     | 63.4 (30.4)  | 57.3 (26.0)   |
| <b>Attachment</b>                                  |                          |                                          |                 |              |               |
| RSQ-Secure                                         | 2.7 (0.6)                | 2.7 (0.5)                                | 2.7 (0.6)       | 2.7 (0.6)    | 2.5 (0.6)     |

|                           |            |           |           |            |           |
|---------------------------|------------|-----------|-----------|------------|-----------|
| RSQ-Fearful               | 2.9 (0.6)  | 2.7 (0.6) | 3.0 (0.6) | 2.9 (0.6)  | 3.1 (0.5) |
| RSQ-Preoccupied           | 2.6 (0.7)  | 2.5 (0.6) | 2.3 (0.7) | 2.7 (0.6)  | 2.7 (0.6) |
| RSQ-Dismissing            | 3.3 (0.8)  | 3.1 (0.8) | 3.6 (0.7) | 3.2 (0.8)  | 3.4 (0.8) |
| <b>Life events</b>        |            |           |           |            |           |
| History of physical abuse | 20 (10.3%) | 6 (9.2%)  | 5 (15.1%) | 6 (7.3%)   | 3 (20.0%) |
| History of sexual abuse   | 27 (13.8%) | 6 (9.2%)  | 7 (21.2%) | 11 (13.4%) | 3 (20.0%) |

%: percentage; m: mean; sd: standard deviation; ADHD: attention-deficit/hyperactivity disorder; AN-BP: anorexia nervosa binge-eating/purging type; AN-R: anorexia nervosa restricting type; BED: binge eating disorder; BN: bulimia nervosa; ED: eating disorder; EDI: Eating Disorders Inventory; MIDI: Minnesota Impulsive Disorders Interview; MINI: Mini International Neuropsychiatric Interview; MROAS: Morgan–Russell Outcome Assessment Schedule; RSQ: Relationship Scales Questionnaire; TCI: Temperament and Character Inventory; UPPS: Impulsive behavior scale; WURS-C: Wender Utah Rating Scale-Child; YFAS: Yale Food Addiction Scale.
